# Supplementary material
Source: publisher site journal article supplement (https://www.dovepress.com/article/579479)
Supplement: Supplementary file 1 [file 579479%20Revised%20Supplementary%20Table%201.docx]

**Supplementary Table 1. Laboratory Results**

|  | Conventional closed-loop warming group | Intelligent closed-loop warming group | *p* |
| --- | --- | --- | --- |
| n=59 | n=59 |
| Preoperative laboratory results | | | |
| WBC, 109/L | 6.41 ±1.96 | 6.67 ± 1.58 | 0.420 |
| Neut count, 109/L | 62.54 ± 9.81 | 59.38 ± 13.49 | 0.148 |
| Lymp count, 109/L | 29.39 ±8.61 | 30.23 ± 7.25 | 0.570 |
| Mono count, 109/L | 5.66 ± 1.64 | 5.57 ± 1.36 | 0.746 |
| EOS count, 109/L | 2.13 ± 3.01 | 2.46 ± 2.28 | 0.512 |
| Baso count, 109/L | 0.61 ±0.47 | 0.49 ± 0.23 | 0.090 |
| RBC, 1012/L | 4.33 ± 0.72 | 4.43 ± 0.76 | 0.444 |
| Neutrophil ratio, % | 5.20 ± 8.71 | 6.06 ± 10.32 | 0.624 |
| Lymphocyte ratio, % | 1.82 ± 0.56 | 1.98 ± 0.56 | 0.131 |
| Monocyte ratio, % | 0.45 ± 0.68 | 0.64 ± 1.21 | 0.275 |
| EOS ratio, % | 2.71 ± 19.64 | 0.22 ± 0.30 | 0.331 |
| Baso ratio, % | 0.04 ± 0.04 | 0.07 ± 0.10 | 0.078 |
| Hemoglobin, g/L | 130.18 ± 23.34 | 137.58 ± 22.69 | 0.084 |
| Platelet count, 109/L | 221.39 ± 48.08 | 230.12 ± 65.96 | 0.413 |
| ALT, U/L | 22.45 ± 19.13 | 22.31 ± 13.93 | 0.963 |
| AST, U/L | 22.49 ± 9.54 | 21.51 ± 6.24 | 0.509 |
| TBiL, umol/L | 11.42 ± 4.40 | 13.20 ± 10.09 | 0.216 |
| DBiL, umol/L | 2.17 ± 1.42 | 2.40 ± 2.51 | 0.529 |
| Total protein, g/L | 79.21 ± 56.13 | 70.74 ± 6.01 | 0.251 |
| Albumin, g/L | 43.11 ± 7.04 | 43.60 ± 4.78 | 0.658 |
| UA, umol/L | 286.15 ± 70.17 | 312.73 ± 88.38 | 0.073 |
| BUN, mmol/L | 6.27 ± 5.43 | 5.82 ± 1.65 | 0.547 |
| FSG, mmol/L | 5.79 ± 1.98 | 5.74 ± 1.44 | 0.873 |
| Scr, umol/L | 63.14 ± 19.26 | 70.95 ± 21.40 | 0.039 |
| CK, U/L | 86.99 ±47.67 | 93.31 ± 56.93 | 0.515 |
| LDH, U/L | 165.04 ± 50.66 | 163.92 ± 39.68 | 0.894 |
| Lipoprotein, mg/dL | 22.58 ± 23.79 | 21.08 ± 20.67 | 0.715 |
| INR | 0.913 ± 0.55 | 0.916 ± 0.55 | 0.750 |
| PTA, s | 114.45 ± 11.27 | 116.15 ± 16.25 | 0.51 |
| APTT, s | 29.00 ± 14.18 | 29.70 ± 31.53 | 0.877 |
| PT, s | 11.32 ± 0.61 | 11.25 ± 0.58 | 0.529 |
| TT, s | 18.27 ± 2.03 | 18.14 ± 2.02 | 0.713 |
| Fibrinogen, g/L | 2.62 ± 0.64 | 2.83 ± 0.99 | 0.172 |
| D-dimer, mg/L FEU | 0.34 ± 0.50 | 0.26 ± 0.24 | 0.272 |
| Serum K+, mmol/L | 3.89 ± 0.35 | 3.91± 0.49 | 0.175 |
| TC, mmol/L | 4.68 ± 0.83 | 4.71 ± 0.92 | 0.855 |
| TG, mmol/L | 2.29 ± 3.66 | 2.27 ± 1.81 | 0.971 |
| HDL. mmol/L | 1.32 ± 0.45 | 1.25 ± 0.40 | 0.327 |
| LDL, mmol/L | 2.71 ± 0.75 | 2.70 ± 0.77 | 0.929 |
| Serum K+, mmol/L | 4.19 ± 0.30 | 4.13 ± 0.58 | 0.53 |
| HS-CRP, mg/L | 3.97 ± 11.56 | 3.02 ± 8.07 | 0.606 |
| NHR | 52.74 ± 23.03 | 51.30 ± 19.02 | 0.713 |
| Postoperative laboratory indicators | | | |
| WBC, 109/L | 12.01 ± 3.42 | 12.89 ± 3.77 | 0.185 |
| Neut count, 109/L | 84.62 ± 5.55 | 84.51 ± 5.00 | 0.909 |
| Lymp count, 109/L | 10.15 ± 4.73 | 10.55 ± 3.95 | 0.619 |
| Mono count, 109/L | 4.82 ± 1.65 | 4.61 ± 1.72 | 0.494 |
| EOS count, 109/L | 0.25 ± 1.19 | 0.16 ± 0.38 | 0.568 |
| Baso count, 109/L | 0.29 ± 1.16 | 0.16 ± 0.09 | 0.392 |
| RBC, 1012/L | 3.99 ± 0.88 | 4.31 ± 0.53 | 0.017 |
| Neutrophil ratio, % | 11.35 ± 9.56 | 14.72 ± 16.10 | 0.17 |
| Lymphocyte ratio, % | 1.32 ± 1.18 | 1.29 ± 0.51 | 0.865 |
| Monocyte ratio, % | 0.65 ± 0.53 | 0.82 ± 1.35 | 0.355 |
| Eosinophil ratio, % | 0.01 ± 0.02 | 0.05 ± 0.19 | 0.105 |
| Baso ratio, % | 0.02 ± 0.02 | 0.02 ± 0.03 | 0.412 |
| Hemoglobin, g/L | 123.76 ± 21.86 | 132.41 ± 14.72 | 0.013 |
| Platelet count, 109/L | 207.25 ± 58.04 | 214.36 ± 61.41 | 0.52 |
| ALT, U/L | 32.16 ± 40.54 | 26.97 ±24.10 | 0.4 |
| AST, U/L | 28.33 ± 15.14 | 27.64 ± 13.18 | 0.791 |
| TBiL, umol/L | 14.76 ± 3.54 | 15.77 ± 5.48 | 0.238 |
| DBiL, umol/L | 4.41 ± 10.07 | 2.81 ± 0.86 | 0.225 |
| Total protein, g/L | 61.19 ± 6.26 | 63.34 ± 5.70 | 0.053 |
| Albumin, g/L | 36.82 ± 2.53 | 37.37 ± 5.22 | 0.466 |
| UA, umol/L | 245.33 ± 57.38 | 273.09 ± 63.98 | 0.07 |
| BUN, mmol/L | 4.72 ± 1.17 | 5.06 ± 1.38 | 0.155 |
| FSG, mmol/L | 6.87 ± 1.97 | 6.74 ± 1.73 | 0.707 |
| Scr, umol/L | 63.50 ± 11.46 | 63.91 ± 10.43 | 0.839 |
| Serum K+, mmol/L | 4.01 ± 0.40 | 4.14 ± 0.40 | 0.086 |
| TC, mmol/L | 4.44 ±0.55 | 4.53 ± 0.55 | 0.38 |
| Triglyceride, mmol/L | 1.39 ± 0.61 | 1.85 ±1.89 | 0.081 |
| HDL. mmol/L | 1.25 ± 0.17 | 1.17 ± 0.17 | 0.018 |
| LDL, mmol/L | 2.66 ±0.52 | 2.75 ± 0.48 | 0.323 |
| BNP, pg/mL | 105.35 ± 59.04 | 112.75 ± 89.48 | 0.597 |
| D-dimer, mg/L FEU | 1.16 ± 0.84 | 3.47 ± 13.18 | 0.182 |
| HS-CRP, mg/L | 20.43 ± 11.65 | 31.64 ± 34.63 | 0.020 |
| NHR | 68.97 ± 10.25 | 73.74 ± 13.68 | 0.017 |

ALT, alanine transaminase; APTT, activated partial thromboplastin time; Baso, basophilic granulocyte; BUN, blood urea nitrogen; CK, Creatine kinase; EOS, eosinophil; FSG, fasting serum glucose; HDL, high-density lipoprotein; HS-CRP, C-reactive protein; INR, international normalized ratio; LDH, lactic dehydrogenase; LDL, low density lipoprotein; Lymp, lymphocyte; Mono, monocyte; Neut, neutrophil; NHR, neutrophil to high-density lipoprotein ratio; PT, prothrombin time; PTA, prothrombin activity; RBC, red blood cell count; Scr, serum creatinine; TBG, total bile pigment; TC, total cholesterol; TG, triglyceride; TT, thrombin time; UA, uric acid; WBC, white blood cell count.
